# Supplementary material for: Onset and Progression of Disease in Nonhuman Primates With PDE6C Cone Disorder
Source: PubMed Central journal article supplement — Invest Ophthalmol Vis Sci. 2024 Dec 6;65(14):16. doi: 10.1167/iovs.65.14.16 (PMC11629912; doi:10.1167/iovs.65.14.16), 2024-12-06
Supplement: iovs-65-14-16_s001.pdf [file iovs-65-14-16_s001.pdf]

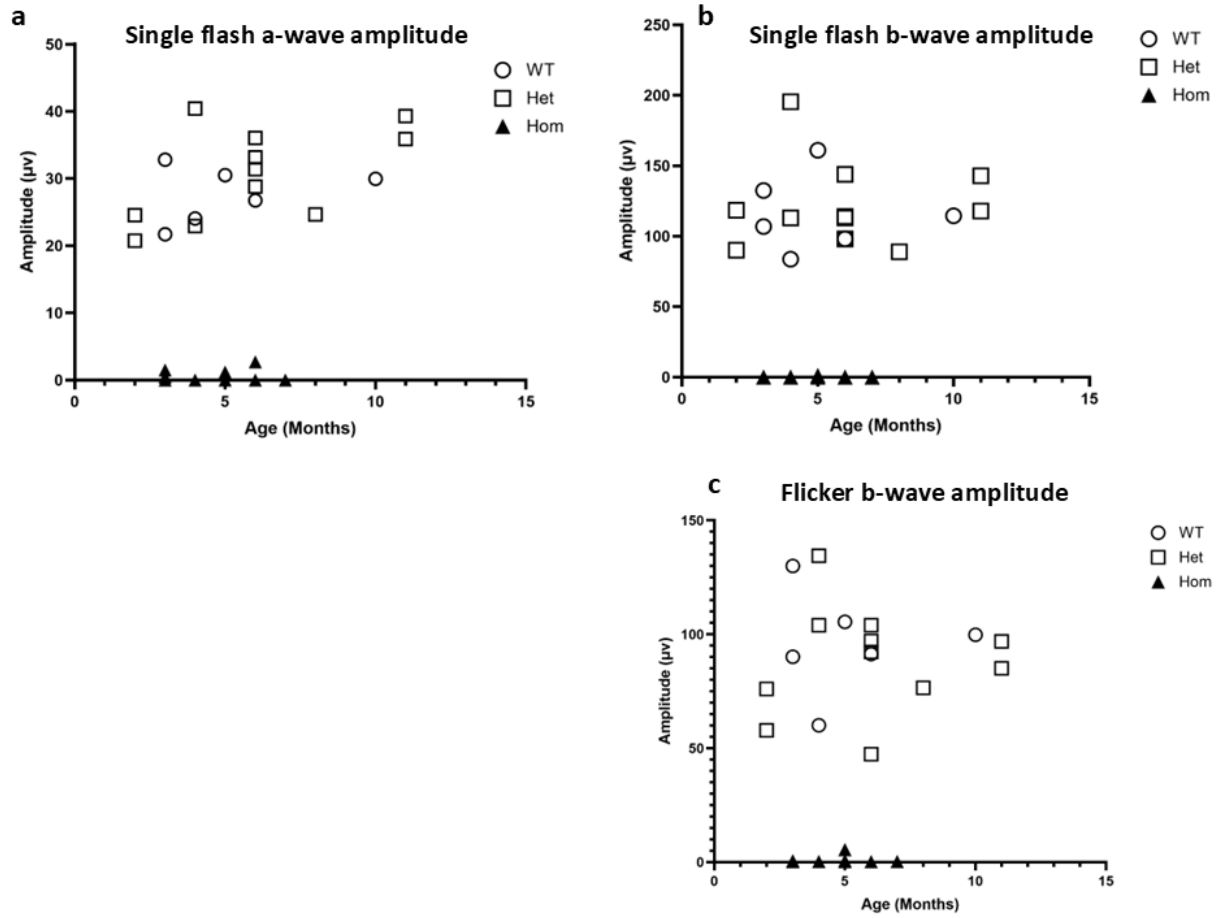

**Supplemental Figure 1. Homozygote infants have no cone photoreceptor response.**

Scatterplots show wildtype (n=6), heterozygote (n=11), and homozygote (n=11) infants at a single flash 3.0 cd•s/m<sup>2</sup> stimulus of both a- (a), b-(b), and flicker (30Hz) (c) waves.

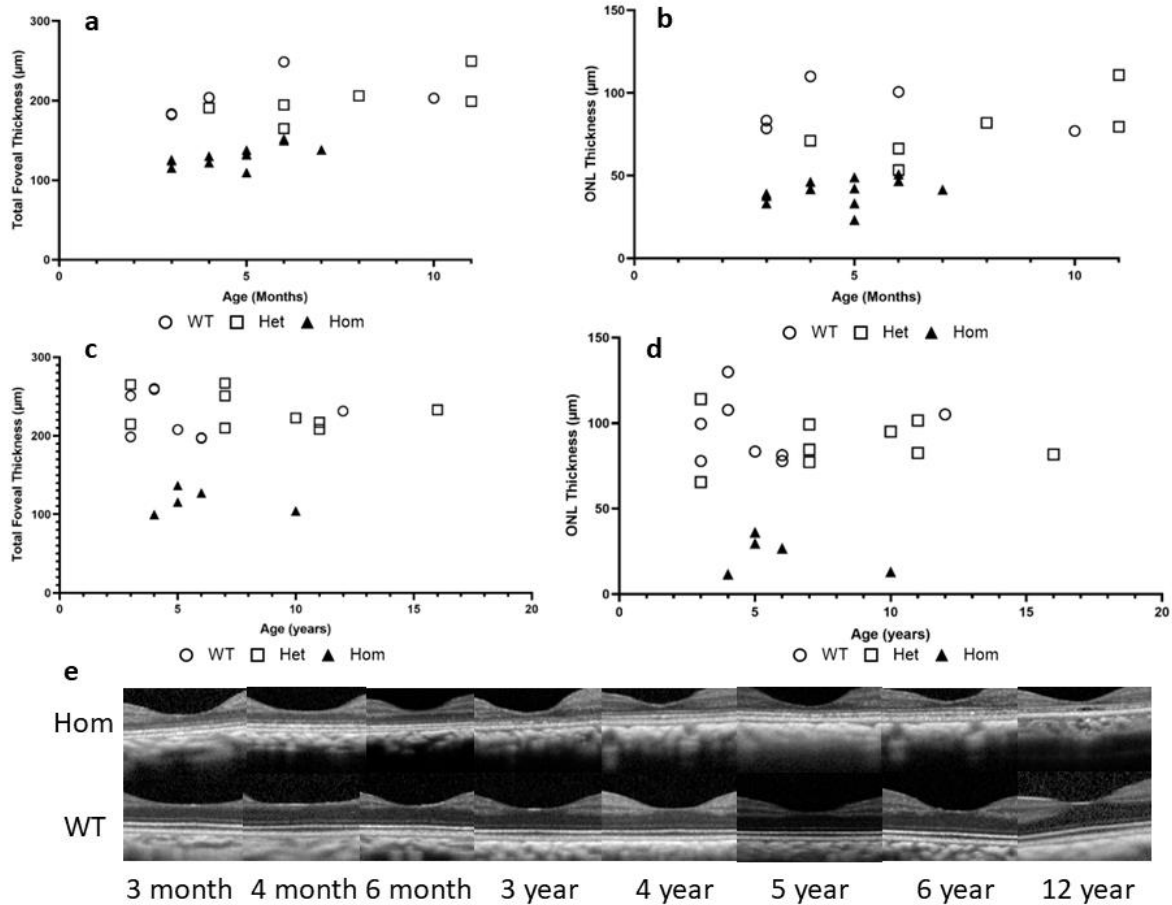

**Supplemental Figure 2. Infant homozygotes as young as 3 months post-natal show reduced total and ONL foveal thickness.** Scatterplots show infant (a-b) and adult (c-d) total foveal thickness and ONL foveal thickness where age is on the x-axis and thickness is on the y-axis. OCT images of age matched wildtype and homozygote primates from infancy to adulthood (e).

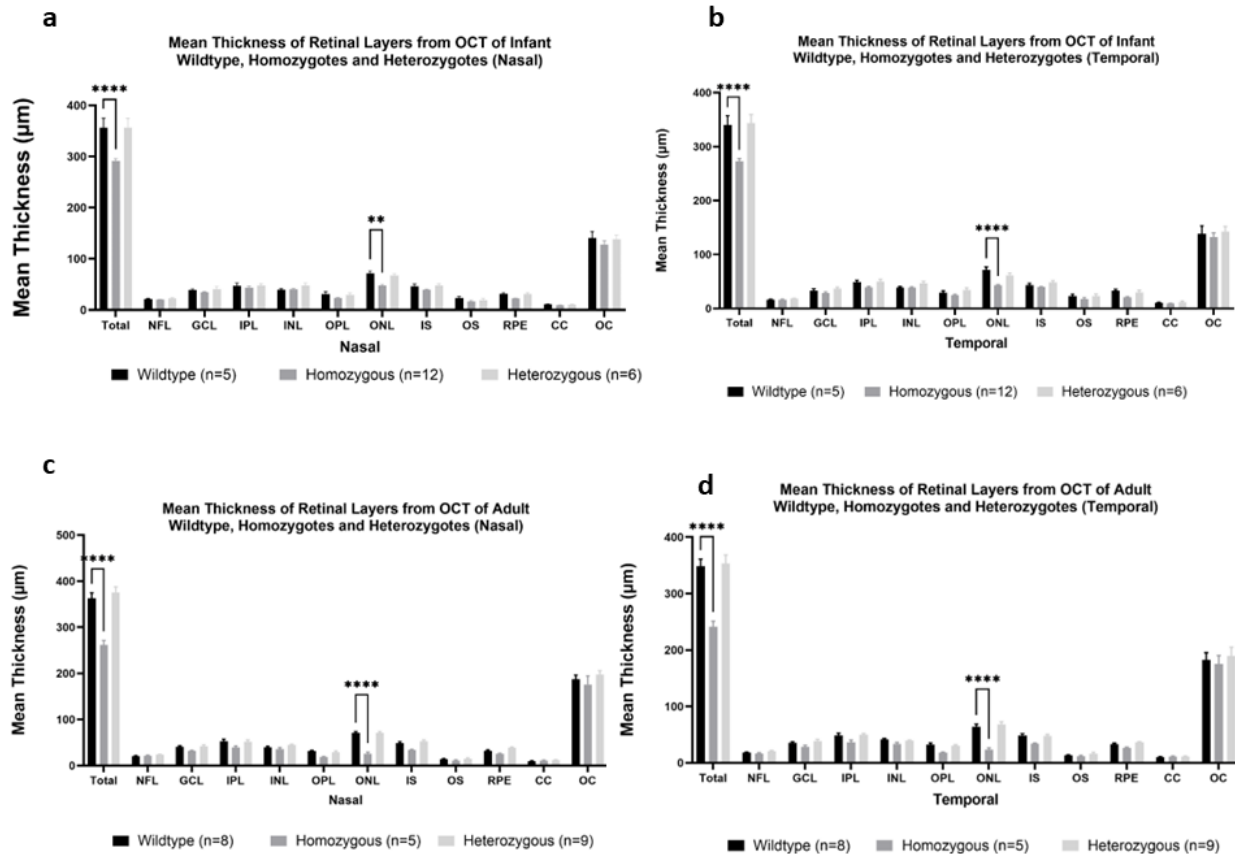

**Supplemental Figure 3. Infant and adult homozygotes show reduced total and ONL thickness nasal and temporal to the fovea.** Bar graphs show infant (**a-b**) and adult (**c-d**) total foveal thickness and ONL foveal thickness where genotype is on the x-axis and thickness is on the y-axis. (**a**) Two-way ANOVA was done in measurements nasal to the fovea showed significant interaction between genotype and retinal layer,  $F(22,240) = 5.309$ ,  $P < 0.0001$ . Dunnett's multiple comparisons found that the total retinal thickness ( $P < 0.0001$ ) and ONL ( $P < 0.0001$ ) are significantly reduced in infant homozygote ( $290.8 \pm 4.9$ ,  $47.8 \pm 1.9$ ) when compared to wildtype ( $356.3 \pm 19.0$ ,  $71.6 \pm 4.7$ ) and heterozygote ( $356.0 \pm 18.5$ ,  $67.4 \pm 3.3$ ) primates. (**b**) Two-way ANOVA was performed in measurements done temporal to the fovea and showed significant interaction between genotype and retinal layer,  $F(22,240) = 6.291$ ,  $P <$

0.0001. Dunnett's multiple comparisons found that the total retinal thickness ( $P < 0.0001$ ) and ONL ( $P < 0.0001$ ) at the temporal measurement are significantly reduced in infant homozygote ( $273.0 \pm 4.9$ ,  $42.9 \pm 1.2$ ) when compared to wildtype ( $340.3 \pm 17.0$ ,  $71.3 \pm 5.6$ ) and heterozygote ( $343.8 \pm 15.9$ ,  $61.4 \pm 4.3$ ) primates, respectively. (c) A Two-way ANOVA showed that there was an interaction between genotype and retinal layer thickness in adult macaques at the nasal area around the fovea,  $F(22,228) = 9.173$ ,  $P < 0.0001$ . Dunnett's multiple comparisons test confirmed that adult homozygotes ( $261.5 \pm 9.9$ ,  $25.5 \pm 3.5$ ) had a significant reduction at both total foveal thickness ( $P < 0.0001$ ) and at the ONL ( $P < 0.0001$ ) when compared to wildtype ( $362.9 \pm 12.0$ ,  $71.0 \pm 2.9$ ) or heterozygote ( $375.8 \pm 11.9$ ,  $71.2 \pm 2.6$ ) primates. (d) This was also seen temporal to the fovea  $F(22,228) = 6.308$ ,  $P < 0.0001$ . Dunnett's multiple comparisons test confirmed that adult homozygotes ( $241.0 \pm 10.1$ ,  $23.3 \pm 3.3$ ) had significant reduction at both total foveal thickness ( $P < 0.0001$ ) and at the ONL ( $P < 0.0001$ ) when compared to wildtype ( $349.0 \pm 12.1$ ,  $63.5 \pm 4.9$ ) or heterozygote ( $353.6 \pm 14.8$ ,  $68.1 \pm 4.4$ ) macaques.

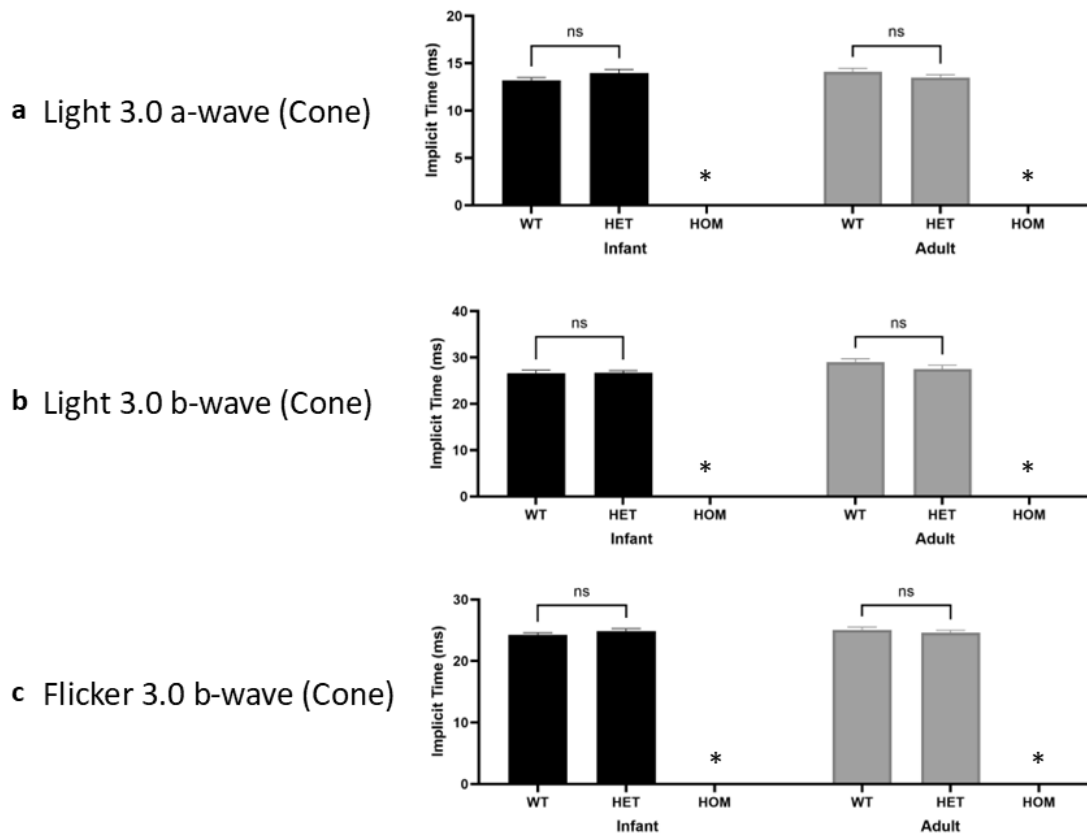

**Supplemental Figure 4. Homozygote infants and adults did not have implicit times when compared to age matched wildtype and heterozygote macaques.** Under light adapted conditions, a single flash 3.0 cd•s/m<sup>2</sup> stimulus of both a- (a), b-(b), and flicker (30Hz) (c) waves from infant and adult wildtype (n=6, 7) and heterozygotes (n=11, 9), respectively, was recorded. Homozygote infant (n=11) and adult (n=5) macaques did not have an implicit time, as graphically denoted by an asterisk (\*). Mean ± SEM of ERG implicit time (ms: milliseconds) were graphically depicted. Two-way ANOVA did not reveal significance amongst genotype and age at any of the three light adapted conditions.
