# Supplementary material for: Onset and Progression of Disease in Nonhuman Primates With PDE6C Cone Disorder
Source: PubMed Central journal article supplement — Invest Ophthalmol Vis Sci. 2024 Dec 6;65(14):16. doi: 10.1167/iovs.65.14.16 (PMC11629912; doi:10.1167/iovs.65.14.16), 2024-12-06
Supplement: iovs-65-14-16_s002.pdf [file iovs-65-14-16_s002.pdf]

| Infant     |           |              |        |          | Adult      |          |              |        |          |
|------------|-----------|--------------|--------|----------|------------|----------|--------------|--------|----------|
| Primate ID | Age       | Genotype     | Sex    | Imaging  | Primate ID | Age      | Genotype     | Sex    | Imaging  |
| 150        | 3 months  | Wildtype     | Male   | OCT/ERG  | 767        | 3 years  | Wildtype     | Female | OCT/ERG  |
| 131        | 4 months  | Wildtype     | Female | OCT/ERG  | 478        | 3 years  | Wildtype     | Female | OCT/ERG  |
| 762        | 4 months  | Wildtype     | Female | OCT/ERG  | 10         | 4 years  | Wildtype     | Female | OCT/ERG  |
| 953        | 5 months  | Wildtype     | Male   | ERG only | 404        | 4 years  | Wildtype     | Male   | OCT/ERG  |
| 615        | 6 months  | Wildtype     | Male   | OCT/ERG  | 210        | 5 years  | Wildtype     | Female | OCT only |
| 419        | 10 months | Wildtype     | Female | OCT/ERG  | 524        | 6 years  | Wildtype     | Female | OCT/ERG  |
| 707        | 3 months  | Homozygous   | Female | OCT/ERG  | 503        | 6 years  | Wildtype     | Male   | OCT/ERG  |
| 593        | 3 months  | Homozygous   | Female | OCT/ERG  | 421        | 12 years | Wildtype     | Female | OCT/ERG  |
| 587        | 3 months  | Homozygous   | Male   | OCT/ERG  | 639        | 4 years  | Homozygous   | Female | OCT/ERG  |
| 425        | 4 months  | Homozygous   | Female | OCT only | 888        | 5 years  | Homozygous   | Female | OCT/ERG  |
| 968        | 4 months  | Homozygous   | Male   | OCT/ERG  | 677        | 5 years  | Homozygous   | Female | OCT/ERG  |
| 670        | 5 months  | Homozygous   | Female | OCT/ERG  | 952        | 6 years  | Homozygous   | Male   | OCT/ERG  |
| 817        | 5 months  | Homozygous   | Female | OCT/ERG  | 314        | 10 years | Homozygous   | Female | OCT/ERG  |
| 488        | 5 months  | Homozygous   | Female | OCT/ERG  | 997        | 3 years  | Heterozygous | Female | OCT/ERG  |
| 496        | 5 months  | Homozygous   | Female | OCT/ERG  | 309        | 3 years  | Heterozygous | Male   | OCT/ERG  |
| 903        | 6 months  | Homozygous   | Female | OCT/ERG  | 388        | 7 years  | Heterozygous | Female | OCT/ERG  |
| 912        | 6 months  | Homozygous   | Female | OCT/ERG  | 486        | 7 years  | Heterozygous | Female | OCT/ERG  |
| 841        | 7 months  | Homozygous   | Male   | OCT/ERG  | 108        | 7 years  | Heterozygous | Female | OCT/ERG  |
| 753        | 2 months  | Heterozygous | Female | ERG only | 785        | 10 years | Heterozygous | Female | OCT/ERG  |
| 771        | 2 months  | Heterozygous | Female | ERG only | 732        | 11 years | Heterozygous | Female | OCT/ERG  |
| 637        | 4 months  | Heterozygous | Male   | ERG only | 17         | 11 years | Heterozygous | Female | OCT/ERG  |
| 55         | 4 months  | Heterozygous | Female | OCT/ERG  | 271        | 16 years | Heterozygous | Male   | OCT/ERG  |
| 213        | 6 months  | Heterozygous | Male   | ERG only |            |          |              |        |          |
| 232        | 6 months  | Heterozygous | Male   | ERG only |            |          |              |        |          |
| 915        | 6 months  | Heterozygous | Male   | OCT/ERG  |            |          |              |        |          |
| 930        | 6 months  | Heterozygous | Female | OCT/ERG  |            |          |              |        |          |
| 818        | 8 months  | Heterozygous | Male   | OCT/ERG  |            |          |              |        |          |
| 987        | 11 months | Heterozygous | Male   | OCT/ERG  |            |          |              |        |          |
| 587        | 11 months | Heterozygous | Male   | OCT/ERG  |            |          |              |        |          |

**Supplemental Table 1. Detailed table showing individual primate with age, genotype, sex, and imaging performed.** The table is organized with infant data on the left and adult data on the right. Within each age group, data is grouped by genotype where wildtype data is presented at the top, followed by heterozygote data and homozygote data.

**Supplemental Table 2. Detailed table showing every statistical test performed in every comparison.** The table is organized in the order that it was mentioned in the paper.

Supplemental Table 1. Overview of statistical analysis performed

| Comparison                                                               | Related Figure            | Genotypes Compared                             | Statistical Test | F value and P value                                                                                | Post Hoc Test                     | Groups Compared              | P value   | Mean Values                                                   |
|--------------------------------------------------------------------------|---------------------------|------------------------------------------------|------------------|----------------------------------------------------------------------------------------------------|-----------------------------------|------------------------------|-----------|---------------------------------------------------------------|
| <b>Infant genotype</b>                                                   |                           |                                                |                  |                                                                                                    |                                   |                              |           |                                                               |
| Amplitude<br>Light Adapted 3.0<br>cd•s•m <sup>-2</sup><br>a-wave         | Figure 1a                 | Wildtype vs<br>Heterozygotes vs<br>Homozygotes | One way ANOVA    | F (2,25) = 167.7<br>P <0.0001<br>Interaction between<br>genotype and amplitude                     | Dunnett's Multiple<br>Comparisons | Wildtype vs<br>Homozygotes   | P <0.0001 | Wildtype (27.6 ± 1.7μV)<br>Homozygotes (0.01 ± 0.3 μV)        |
|                                                                          |                           |                                                |                  |                                                                                                    |                                   | Wildtype vs<br>Heterozygotes | P =0.1439 | Wildtype (27.6 ± 1.7μV)<br>Heterozygote (31.5 ± 1.8μV)        |
| Amplitude<br>Light Adapted<br>3.0 cd•s•m <sup>-2</sup><br>b-wave         | Figure 1a                 | Wildtype vs<br>Heterozygotes vs<br>Homozygotes | One way ANOVA    | F (2,25) = 91.70<br>P <0.0001<br>Interaction between<br>genotype and amplitude                     | Dunnett's Multiple<br>Comparisons | Wildtype vs<br>Homozygotes   | P <0.0001 | Wildtype (116.2 ± 11.2μV)<br>Homozygote (0.1 ± 0.1 μV)        |
|                                                                          |                           |                                                |                  |                                                                                                    |                                   | Wildtype vs<br>Heterozygotes | P =0.8459 | Wildtype (116.2 ± 11.2μV)<br>Heterozygote (121.4 ± 9.2)       |
| Amplitude<br>Light Adapted<br>3.0 cd•s•m <sup>-2</sup><br>Flicker b-wave | Figure 1a                 | Wildtype vs<br>Heterozygotes vs<br>Homozygotes | One way ANOVA    | F (2,25) = 82.11<br>P <0.0001<br>Interaction between<br>genotype and amplitude                     | Dunnett's Multiple<br>Comparisons | Wildtype vs<br>Homozygotes   | P <0.0001 | Wildtype (96.2 ± 9.3μV)<br>Homozygote (0.8 ± 0.5 μV)          |
|                                                                          |                           |                                                |                  |                                                                                                    |                                   | Wildtype vs<br>Heterozygotes | P =0.5881 | Wildtype (96.2 ± 9.3μV)<br>Heterozygote (88.4 ± 7.2 μV)       |
| OCT Total Foveal<br>Thickness                                            | Figure 2a                 | Wildtype vs<br>Heterozygotes vs<br>Homozygotes | Two-way ANOVA    | F (14,160) = 7.407<br>P <0.0001<br>Interaction between<br>genotype and retinal<br>layer thickness  | Dunnett's Multiple<br>Comparisons | Wildtype vs<br>Homozygotes   | P <0.0001 | Wildtype (204.3 ± 12 μm)<br>Homozygotes (130.9 ± 3.6 μm)      |
|                                                                          |                           |                                                |                  |                                                                                                    |                                   | Wildtype vs<br>Heterozygotes | P =0.8932 | Wildtype (204.3 ± 12 μm)<br>Heterozygote (200.8 ± 11.3 μm)    |
| OCT ONL Foveal<br>Thickness                                              | Figure 2a                 | Wildtype vs<br>Heterozygotes vs<br>Homozygotes | Two-way ANOVA    | F (14,160) = 7.407<br>P <0.0001<br>Interaction between<br>genotype and retinal<br>layer thickness  | Dunnett's Multiple<br>Comparisons | Wildtype vs<br>Homozygotes   | P <0.0001 | Wildtype (89.9 ± 6.5 μm)<br>Homozygotes (40.5 ± 2.3 μm)       |
|                                                                          |                           |                                                |                  |                                                                                                    |                                   | Wildtype vs<br>Heterozygotes | P =0.2730 | Wildtype (89.9 ± 6.5 μm)<br>Heterozygotes (77.2 ± 7.9 μm)     |
| OCT Total Nasal<br>Thickness                                             | Supplemental<br>Figure 3a | Wildtype vs<br>Heterozygotes vs<br>Homozygotes | Two-way ANOVA    | F (22,240) = 5.309<br>P <0.0001<br>Interaction between<br>genotype and retinal<br>layer thickness  | Dunnett's Multiple<br>Comparisons | Wildtype vs<br>Homozygotes   | P <0.0001 | Wildtype (356.3 ± 19.0 μm)<br>Homozygotes (290.8 ± 4.9 μm)    |
|                                                                          |                           |                                                |                  |                                                                                                    |                                   | Wildtype vs<br>Heterozygotes | P =0.9992 | Wildtype (356.3 ± 19.0 μm)<br>Heterozygotes (356.0 ± 18.5 μm) |
| OCT ONL Nasal<br>Thickness                                               | Supplemental<br>Figure 3a | Wildtype vs<br>Heterozygotes vs<br>Homozygotes | Two-way ANOVA    | F (22,240) = 6.291<br>P <0.0001<br>Interaction between<br>genotype and retinal<br>layer thickness  | Dunnett's Multiple<br>Comparisons | Wildtype vs<br>Homozygotes   | P <0.0001 | Wildtype (71.6 ± 4.7 μm)<br>Homozygotes (47.8 ± 1.9 μm)       |
|                                                                          |                           |                                                |                  |                                                                                                    |                                   | Wildtype vs<br>Heterozygotes | P =0.4395 | Wildtype (71.6 ± 4.7 μm)<br>Heterozygotes (67.4 ± 3.3 μm)     |
| OCT Total<br>Temporal<br>Thickness                                       | Supplemental<br>Figure 3b | Wildtype vs<br>Heterozygotes vs<br>Homozygotes | Two-way ANOVA    | F (22, 240) = 6.292<br>P <0.0001<br>Interaction between<br>genotype and retinal<br>layer thickness | Dunnett's Multiple<br>Comparisons | Wildtype vs<br>Homozygotes   | P <0.0001 | Wildtype (340.3 ± 17.0 μm)<br>Homozygotes (273.0 ± 4.9 μm)    |
|                                                                          |                           |                                                |                  |                                                                                                    |                                   | Wildtype vs<br>Heterozygotes | P =0.8550 | Wildtype (340.3 ± 17.0 μm)<br>Heterozygotes (343.8 ± 15.9 μm) |

|                              |                        |                                          |               |                                                                                                     |                                |                                                                                                  |                                                                                                                                  |  |
|------------------------------|------------------------|------------------------------------------|---------------|-----------------------------------------------------------------------------------------------------|--------------------------------|--------------------------------------------------------------------------------------------------|----------------------------------------------------------------------------------------------------------------------------------|--|
| OCT ONL Temporal Thickness   | Supplemental Figure 3b | Wildtype vs Heterozygotes vs Homozygotes | Two-way ANOVA | F (22, 240) = 6.292<br><i>P</i> <0.0001<br>Interaction between genotype and retinal layer thickness | Dunnett's Multiple Comparisons | Wildtype vs Homozygotes<br><i>P</i> <0.0001<br><br>Wildtype vs Heterozygotes<br><i>P</i> =0.3209 | Wildtype (71.3 ± 5.6 μm)<br>Homozygotes (42.9 ± 1.2 μm)<br><br>Wildtype (71.3 ± 5.6 μm)<br>Heterozygotes (61.4 ± 4.3 μm)         |  |
| <b>Adult genotype</b>        |                        |                                          |               |                                                                                                     |                                |                                                                                                  |                                                                                                                                  |  |
| OCT Total Foveal Thickness   | Figure 3a              | Wildtype vs Heterozygotes vs Homozygotes | Two-way ANOVA | F (14, 152) = 19.53<br><i>P</i> <0.0001<br>Interaction between genotype and retinal layer thickness | Dunnett's Multiple Comparisons | Wildtype vs Homozygotes<br><i>P</i> <0.0001<br><br>Wildtype vs Heterozygotes<br><i>P</i> =0.4513 | Wildtype (225.2 ± 10.0 μm)<br>Homozygotes (116.7 ± 6.9 μm)<br><br>Wildtype (225.2 ± 10.0 μm)<br>Heterozygote (232.0 ± 7.8 μm)    |  |
| OCT ONL Foveal Thickness     | Figure 3a              | Wildtype vs Heterozygotes vs Homozygotes | Two-way ANOVA | F (14, 152) = 19.53<br><i>P</i> <0.0001<br>Interaction between genotype and retinal layer thickness | Dunnett's Multiple Comparisons | Wildtype vs Homozygotes<br><i>P</i> <0.0001<br><br>Wildtype vs Heterozygotes<br><i>P</i> =0.5030 | Wildtype (95.3 ± 6.6 μm)<br>Homozygotes (18.16 ± 3.2 μm)<br><br>Wildtype (95.3 ± 6.6 μm)<br>Heterozygotes (89.0 ± 4.9 μm)        |  |
| OCT Total Nasal Thickness    | Supplemental Figure 3c | Wildtype vs Heterozygotes vs Homozygotes | Two-way ANOVA | F (22, 228) = 9.173<br><i>P</i> <0.0001<br>Interaction between genotype and retinal layer thickness | Dunnett's Multiple Comparisons | Wildtype vs Homozygotes<br><i>P</i> <0.0001<br><br>Wildtype vs Heterozygotes<br><i>P</i> =0.1091 | Wildtype (362.9 ± 12.0 μm)<br>Homozygotes (261.5 ± 9.9 μm)<br><br>Wildtype (362.9 ± 12.0 μm)<br>Heterozygotes (375.8 ± 11.9 μm)  |  |
| OCT ONL Nasal Thickness      | Supplemental Figure 3c | Wildtype vs Heterozygotes vs Homozygotes | Two-way ANOVA | F (22, 228) = 9.173<br><i>P</i> <0.0001<br>Interaction between genotype and retinal layer thickness | Dunnett's Multiple Comparisons | Wildtype vs Homozygotes<br><i>P</i> <0.0001<br><br>Wildtype vs Heterozygotes<br><i>P</i> =0.4395 | Wildtype (71.0 ± 2.9 μm)<br>Homozygotes (25.5 ± 3.5 μm)<br><br>Wildtype (71.0 ± 2.9 μm)<br>Heterozygotes (71.2 ± 2.6 μm)         |  |
| OCT Total Temporal Thickness | Supplemental Figure 3d | Wildtype vs Heterozygotes vs Homozygotes | Two-way ANOVA | F (22, 228) = 6.308<br><i>P</i> <0.0001<br>Interaction between genotype and retinal layer thickness | Dunnett's Multiple Comparisons | Wildtype vs Homozygotes<br><i>P</i> <0.0001<br><br>Wildtype vs Heterozygotes<br><i>P</i> =0.8079 | Wildtype (349.0 ± 12.1 μm)<br>Homozygotes (241.0 ± 10.1 μm)<br><br>Wildtype (349.0 ± 12.1 μm)<br>Heterozygotes (353.6 ± 14.8 μm) |  |
| OCT ONL Temporal Thickness   | Supplemental Figure 3d | Wildtype vs Heterozygotes vs Homozygotes | Two-way ANOVA | F (22, 228) = 6.308<br><i>P</i> <0.0001<br>Interaction between genotype and retinal layer thickness | Dunnett's Multiple Comparisons | Wildtype vs Homozygotes<br><i>P</i> <0.0001<br><br>Wildtype vs Heterozygotes<br><i>P</i> =0.8087 | Wildtype (63.5 ± 4.9 μm)<br>Homozygotes (23.3 ± 3.3 μm)<br><br>Wildtype (63.5 ± 4.9 μm)<br>Heterozygotes (68.1 ± 4.4 μm)         |  |

**Adult vs Infant**

|                                                                 |           |                                          |               |                                                                                       |                  |                                  |           |                                                              |
|-----------------------------------------------------------------|-----------|------------------------------------------|---------------|---------------------------------------------------------------------------------------|------------------|----------------------------------|-----------|--------------------------------------------------------------|
| OCT ONL Foveal Thickness                                        | Figure 3b | Infant Homozygotes vs Adult Homozygotes  | Two-way ANOVA | F (7,120) = 3.323<br>P =0.0029<br>Interaction between age and retinal layer thickness | Holm-Šidák       | Infant vs Adult                  | P =0.003  | Infant (40.5 ± 2.3 μm)<br>Adult (18.2 ± 3.2 μm)              |
| Amplitude Light Adapted 3.0 cd•s•m <sup>-2</sup> Flicker b-wave | Figure 1b | Wildtype vs Heterozygotes vs Homozygotes | Two-way ANOVA | F (2, 43) = 62.16<br>P <0.0001<br>Significance amongst genotype                       | Tukey's Analysis | Infant Wildtype vs Homozygotes   | P <0.0001 | Wildtype (96.2 ± 9.3 μV)<br>Homozygotes (0.8 ± 0.5 μV)       |
|                                                                 |           |                                          |               |                                                                                       |                  | Infant Wildtype vs Heterozygotes | P =0.9799 | Wildtype (96.2 ± 9.3 μV)<br>Heterozygotes (88.4 ± 7.2 μV)    |
|                                                                 |           |                                          |               |                                                                                       |                  | Adult Wildtype vs Homozygotes    | P <0.0001 | Wildtype (66.7 ± 15.2 μV)<br>Homozygotes (0.3 ± 0.0 μV)      |
|                                                                 |           |                                          |               |                                                                                       |                  | Adult Wildtype vs Heterozygotes  | P >0.9999 | Wildtype (66.7 ± 15.2 μV)<br>Heterozygotes (64.2 ± 5.6 μV)   |
| Amplitude Light Adapted 3.0 cd•s•m <sup>-2</sup> a-wave         | Figure 1b | Wildtype vs Heterozygotes vs Homozygotes | Two-way ANOVA | F (2, 43) = 107.7<br>P <0.0001<br>Significance amongst genotype                       | Tukey's Analysis | Infant Wildtype vs Homozygotes   | P <0.0001 | Wildtype (27.6 ± 1.7 μV)<br>Homozygotes (0.0 ± 0.3 μV)       |
|                                                                 |           |                                          |               |                                                                                       |                  | Infant Wildtype vs Heterozygotes | P =0.7724 | Wildtype (27.6 ± 1.7 μV)<br>Heterozygotes (31.5 ± 1.8 μV)    |
|                                                                 |           |                                          |               |                                                                                       |                  | Adult Wildtype vs Homozygotes    | P <0.0001 | Wildtype (25.2 ± 4.2 μV)<br>Homozygotes (0.2 ± 0.2 μV)       |
|                                                                 |           |                                          |               |                                                                                       |                  | Adult Wildtype vs Homozygotes    | P =0.9987 | Wildtype (25.2 ± 4.2 μV)<br>Heterozygotes (24.1 ± 1.7 μV)    |
| Amplitude Light Adapted 3.0 cd•s•m <sup>-2</sup> b-wave         | Figure 1b | Wildtype vs Heterozygotes vs Homozygotes | Two-way ANOVA | F (2, 43) = 66.45<br>P <0.0001<br>Significance amongst genotype                       | Tukey's Analysis | Infant Wildtype vs Homozygotes   | P <0.0001 | Wildtype (116.2 ± 11.2 μV)<br>Homozygotes (0.1 ± 0.1 μV)     |
|                                                                 |           |                                          |               |                                                                                       |                  | Infant Wildtype vs Heterozygotes | P =0.9989 | Wildtype (116.2 ± 11.2 μV)<br>Heterozygotes (121.4 ± 9.2 μV) |
|                                                                 |           |                                          |               |                                                                                       |                  | Adult Wildtype vs Homozygotes    | P <0.0001 | Wildtype (96.2 ± 20.1 μV)<br>Homozygotes (0.0 ± 0.0 μV)      |
|                                                                 |           |                                          |               |                                                                                       |                  | Adult Wildtype vs Heterozygotes  | P =0.6854 | Wildtype (96.2 ± 20.1 μV)<br>Heterozygotes (75.9 ± 5.9 μV)   |

|                                                                                                    |                           |                              |               |                                                                                  |                  |                                                |            |                                                                                       |
|----------------------------------------------------------------------------------------------------|---------------------------|------------------------------|---------------|----------------------------------------------------------------------------------|------------------|------------------------------------------------|------------|---------------------------------------------------------------------------------------|
| Implicit Time<br>Light Adapted 3.0<br>$\text{cd}\cdot\text{s}\cdot\text{m}^{-2}$<br>a-wave         | Supplemental<br>Figure 4a | Wildtype vs<br>Heterozygotes | Two-way ANOVA | F (1, 29) = 3.296<br>$P=0.0798$<br>No Significance<br>amongst genotype or<br>age | Tukey's Analysis | <i>Infant</i><br>Wildtype vs<br>Heterozygotes  | $P=0.4949$ | Wildtype ( $12.2 \pm 0.3$ ms)<br>Heterozygotes ( $14.0 \pm 0.4$ ms)                   |
|                                                                                                    |                           |                              |               |                                                                                  |                  | <i>Adult</i><br>Wildtype vs<br>Heterozygotes   | $P=0.7531$ | Wildtype ( $14.1 \pm 0.4$ ms)<br>Heterozygotes ( $13.5 \pm 0.3$ ms)                   |
|                                                                                                    |                           |                              |               |                                                                                  |                  | Infant wildtype vs Adult<br>wildtype           | $P=0.4286$ | Wildtype ( $12.2 \pm 0.3$ ms)<br>Wildtype ( $14.1 \pm 0.4$ ms)                        |
|                                                                                                    |                           |                              |               |                                                                                  |                  | Infant heterozygotes vs<br>Adult heterozygotes | $P=0.7591$ | Infant Heterozygotes ( $14.0 \pm 0.4$ ms)<br>Adult Heterozygotes ( $13.5 \pm 0.3$ ms) |
| Implicit Time<br>Light Adapted 3.0<br>$\text{cd}\cdot\text{s}\cdot\text{m}^{-2}$<br>b-wave         | Supplemental<br>Figure 4b | Wildtype vs<br>Heterozygotes | Two-way ANOVA | F (1,29) = 1.319<br>$P=0.2601$<br>No significance<br>amongst genotype or<br>age  | Tukey's Analysis | <i>Infant</i><br>Wildtype vs<br>Heterozygotes  | $P=0.9996$ | Wildtype ( $26.6 \pm 0.6$ ms)<br>Heterozygotes ( $26.7 \pm 0.5$ ms)                   |
|                                                                                                    |                           |                              |               |                                                                                  |                  | <i>Adult</i><br>Wildtype vs<br>Heterozygotes   | $P=0.4345$ | Wildtype ( $29.0 \pm 0.8$ ms)<br>Heterozygotes ( $27.5 \pm 0.8$ ms)                   |
|                                                                                                    |                           |                              |               |                                                                                  |                  | Infant wildtype vs Adult<br>wildtype           | $P=0.1330$ | Infant Wildtype ( $26.6 \pm 0.6$ ms)<br>Adult Wildtype ( $29.0 \pm 0.8$ ms)           |
|                                                                                                    |                           |                              |               |                                                                                  |                  | Infant heterozygotes vs<br>Adult heterozygotes | $P=0.7721$ | Infant Heterozygotes ( $26.7 \pm 0.5$ ms)<br>Adult Heterozygotes ( $27.5 \pm 0.8$ ms) |
| Implicit Time<br>Light Adapted 3.0<br>$\text{cd}\cdot\text{s}\cdot\text{m}^{-2}$<br>Flicker b-wave | Supplemental<br>Figure 4c | Wildtype vs<br>Heterozygotes | Two-way ANOVA | F (1,29) = 1.794<br>$P=0.1908$<br>No significance<br>amongst genotype or<br>age  | Tukey's Analysis | <i>Infant</i><br>Wildtype vs<br>Heterozygotes  | $P=0.7694$ | Wildtype ( $24.3 \pm 0.3$ ms)<br>Heterozygotes ( $24.9 \pm 0.4$ ms)                   |
|                                                                                                    |                           |                              |               |                                                                                  |                  | <i>Adult</i><br>Wildtype vs<br>Heterozygotes   | $P=0.9218$ | Wildtype ( $25.1 \pm 0.4$ ms)<br>Heterozygotes ( $24.6 \pm 0.4$ ms)                   |
|                                                                                                    |                           |                              |               |                                                                                  |                  | Infant wildtype vs Adult<br>wildtype           | $P=0.5578$ | Infant Wildtype ( $24.3 \pm 0.3$ ms)<br>Adult Wildtype ( $25.1 \pm 0.4$ ms)           |
|                                                                                                    |                           |                              |               |                                                                                  |                  | Infant heterozygote vs<br>Adult heterozygote   | $P=0.9591$ | Infant Heterozygotes ( $24.9 \pm 0.4$ ms)<br>Adult Heterozygotes ( $24.6 \pm 0.4$ ms) |
